# Supplementary material for: Photoluminescence and electroluminescence of iridium(iii) complexes with 2′,6′-bis(trifluoromethyl)-2,4′-bipyridine and 1,3,4-oxadiazole/1,3,4-thiadiazole derivative ligands
Source: Royal Society of Chemistry journal article supplement (doi:10.1039/c6dt03919g), 2016-12-12
Supplement: c6dt03919g1.pdf [file c6dt03919g1.pdf]

## Supporting Information

### **Photoluminescence and electroluminescence of iridium(III) complexes with 2',6'-bis(trifluoromethyl)-2,4'-bipyridine and 1,3,4-oxadiazole/1,3,4-thiadiazole derivatives ligands**

Yi-Ming Jing<sup>a</sup>, Yue Zhao<sup>a</sup>, You-Xuan Zheng<sup>a,b\*</sup>

<sup>a</sup> *State Key Laboratory of Coordination Chemistry, Collaborative Innovation Center of Advanced Microstructures, School of Chemistry and Chemical Engineering, Nanjing University, Nanjing 210093, P. R. China, e-mail: yxzheng@nju.edu.cn*

<sup>b</sup> *MaAnShan High-Tech Research Institute of Nanjing University, MaAnShan, 238200, P. R. China*

**Table S1.** Parameters associated with the single crystal diffraction data collection for **Ir1**

|                                                                                                                                     | <b>Ir1</b>                                                                      |
|-------------------------------------------------------------------------------------------------------------------------------------|---------------------------------------------------------------------------------|
| Formula                                                                                                                             | C <sub>39</sub> H <sub>18</sub> F <sub>15</sub> IrN <sub>6</sub> O <sub>2</sub> |
| Formula weight                                                                                                                      | 1079.79                                                                         |
| T (K)                                                                                                                               | 296(2)                                                                          |
| Wavelength (Å)                                                                                                                      | 0.71073                                                                         |
| Crystal system                                                                                                                      | Monoclinic                                                                      |
| Space group                                                                                                                         | <i>P</i> 2 <sub>1</sub> / <i>c</i>                                              |
| <i>a</i> (Å)                                                                                                                        | 11.6755(5)                                                                      |
| <i>b</i> (Å)                                                                                                                        | 13.7860(5)                                                                      |
| <i>c</i> (Å)                                                                                                                        | 24.0468(9)                                                                      |
| $\alpha$ (deg)                                                                                                                      | 90.00                                                                           |
| $\beta$ (deg)                                                                                                                       | 93.2230(10)                                                                     |
| $\gamma$ (deg)                                                                                                                      | 90.00                                                                           |
| <i>V</i> (Å <sup>3</sup> )                                                                                                          | 3864.4(3)                                                                       |
| <i>Z</i>                                                                                                                            | 4                                                                               |
| $\rho_{\text{calcd}}$ (g/cm <sup>3</sup> )                                                                                          | 1.856                                                                           |
| $\mu$ (Mo K $\alpha$ ) (mm <sup>-1</sup> )                                                                                          | 3.573                                                                           |
| <i>F</i> (000)                                                                                                                      | 2088                                                                            |
| Range of transm factors (deg)                                                                                                       | 1.70-25.01                                                                      |
| Reflns collected                                                                                                                    | 21215                                                                           |
| Unique( <i>R</i> <sub>int</sub> )                                                                                                   | 6808(0.0243)                                                                    |
| <i>R</i> <sub><i>I</i></sub> <sup><i>a</i></sup> , <i>wR</i> <sub>2</sub> <sup><i>b</i></sup> [ <i>I</i> > 2 <i>s</i> ( <i>I</i> )] | 0.0240, 0.0579                                                                  |
| <i>R</i> <sub><i>I</i></sub> <sup><i>a</i></sup> , <i>wR</i> <sub>2</sub> <sup><i>b</i></sup> (all data)                            | 0.0306, 0.0604                                                                  |
| GOF on <i>F</i> <sup>2</sup>                                                                                                        | 1.093                                                                           |
| CCDC number                                                                                                                         | 1455234                                                                         |

$$R_I^a = \frac{\sum ||F_o| - |F_c||}{\sum F_o}, \quad wR_2^b = \left[ \frac{\sum w(F_o^2 - F_c^2)^2}{\sum w(F_o^2)} \right]^{1/2}$$

$$\text{GOF} = \left[ \frac{\sum w|F_o| - |F_c|}{\sum w|F_o|} \right]^2 / (N_{\text{obs}} - N_{\text{param}})^{1/2}$$

**Table S2.** The table of selected bond lengths and angles of **Ir1**.

| Selected Bond | Bond Length (Å) | Selected Angle   | Bond Angle (°) |
|---------------|-----------------|------------------|----------------|
| Ir(1)-C(1)    | 2.038(3)        | C(13)-Ir(1)-C(1) | 95.70(13)      |
| Ir(1)-C(13)   | 2.034(3)        | C(13)-Ir(1)-N(4) | 105.23(12)     |
| Ir(1)-N(2)    | 2.098(3)        | C(1)-Ir(1)-N(4)  | 80.66(12)      |
| Ir(1)-N(4)    | 2.044(3)        | C(13)-Ir(1)-N(6) | 80.72(13)      |
| Ir(1)-N(6)    | 2.045(3)        | C(1)-Ir(1)-N(6)  | 103.74(12)     |
| Ir(1)-O(1)    | 2.102(2)        | N(4)-Ir(1)-N(6)  | 172.38(11)     |
|               |                 | C(13)-Ir(1)-N(2) | 93.05(12)      |
|               |                 | C(1)-Ir(1)-N(2)  | 169.25(11)     |
|               |                 | N(4)-Ir(1)-N(2)  | 91.04(11)      |
|               |                 | N(6)-Ir(1)-N(2)  | 83.81(11)      |
|               |                 | C(13)-Ir(1)-O(1) | 172.22(12)     |
|               |                 | C(1)-Ir(1)-O(1)  | 84.90(11)      |
|               |                 | N(4)-Ir(1)-O(1)  | 82.53(11)      |
|               |                 | N(6)-Ir(1)-O(1)  | 91.59(11)      |
|               |                 | N(2)-Ir(1)-O(1)  | 87.23(10)      |

**Table S3.** Electrochemical data of **Ir1** and **Ir2**.

| Complex    | $E_{ox}$ (V) <sup>a)</sup> | $E_{red}$ (V) | HOMO(eV) <sup>b)</sup> | LUMO(eV) | $E_g$ (eV) |
|------------|----------------------------|---------------|------------------------|----------|------------|
| <b>Ir1</b> | 0.96                       | -1.40         | -5.59                  | -2.84    | 2.75       |
| <b>Ir2</b> | 0.89                       | -1.40         | -5.57                  | -3.09    | 2.48       |

<sup>a)</sup> Oxidation potential measured in solution at 50 mV/s.

<sup>b)</sup> The HOMO energy levels were calculated from the equation: HOMO (eV) =  $E_{ox} - E_{Fc/Fc^+} + 4.8$ .

**Table S4.** Percentage distributions of HOMO and LUMO in **Ir1** and **Ir2**.

| Complex    | Orbital | Energy/eV    | $E_{gap}$ /eV | Composition (%) |       |       |
|------------|---------|--------------|---------------|-----------------|-------|-------|
|            |         | (Calculated) | (Calculated)  | Ir              | BTBP  | LX    |
| <b>Ir1</b> | HOMO    | -5.566       | 3.370         | 14.70           | 5.36  | 79.95 |
|            | LUMO    | -2.196       |               | 1.94            | 69.39 | 28.67 |
| <b>Ir2</b> | HOMO    | -5.544       | 3.186         | 15.02           | 5.23  | 79.65 |
|            | LUMO    | -2.357       |               | 0.96            | 9.23  | 89.81 |
